# Supplementary material for: Ca2+-activated sphingomyelin scrambling and turnover mediate ESCRT-independent lysosomal repair
Source: PubMed Central journal article supplement (PMC8986845; doi:10.1038/s41467-022-29481-4), 2022-04-06
Supplement: 41467_2022_29481_MOESM3_ESM.pdf [file 41467_2022_29481_MOESM3_ESM.pdf]

## **Description of Additional Supplementary Files**

### **File name: Supplementary Movie 1**

Description: Time-lapse images of HeLa cells co-expressing GFP-tagged EqtSM (left, *green*) and mCherry-tagged Gal3 (middle, *magenta*) treated with 1mM LLOMe for the indicated time. Images were captured every 30 s. Scale bar, 10  $\mu\text{m}$ .

### **File name: Supplementary Movie 2**

Description: Time-lapse images of RAW264.7 cells expressing GFP-tagged EqtSM (*green*) infected with mCherry-expressing *M. marinum* (*magenta*). Images were captured every 60 s. Scale bar, 10  $\mu\text{m}$ .

### **File name: Supplementary Movie 3**

Description: Time-lapse images of HeLa cells expressing GFP-tagged EqtSM locally wounded by a brief pulse from a 2-photon laser at high relative intensity (top wound,  $t = 0$  s) and low relative intensity (bottom wound,  $t = 65$  s). Images were captured every 5 s. Scale bar, 10  $\mu\text{m}$ .

### **File name: Supplementary Movie 4**

Description: Time-lapse images of HeLa cells expressing GFP-tagged EqtSM (left, *green*) and labeled with LysoTracker (middle, *red*) during and after a 2 min-pulse of GPN (200  $\mu\text{M}$ ). Images were captured every 30 s. Scale bar, 10  $\mu\text{m}$ .

### **File name: Supplementary Movie 5**

Description: Time-lapse images of HeLa cells expressing EqtSM-Halo labeled with silicone rhodamine (*blue*) and infected with *Salmonella* carrying a plasmid for constitutive expression of dsRed (*magenta*) and encoding sfGFP under control of the glucose-6-phosphate (G6P)-inducible promoter  $P_{uhpT}$  (*green*). Images were captured every 2 min, starting at 30 min post-infection. Scale bar, 10  $\mu\text{m}$ .

**File name: Supplementary Movie 6**

Description: Time-lapse images of HeLa cells co-expressing mKate-tagged EqtSM (left, *green*) and eGFP-tagged CHMP4B (middle, *magenta*) treated with 1 mM LLOMe for the indicated time. Images were captured every 10 s.

Scale bar, 10  $\mu\text{m}$ .

**File name: Supplementary Movie 7**

Description: Time-lapse images of HeLa cells co-expressing mKate-tagged EqtSM (left, *green*) and GFP-tagged LAMP1-bSMase (middle, *magenta*) treated with 1 mM LLOMe for the indicated time. Images were captured every

30 s. Scale bar, 10  $\mu\text{m}$ .

**File name: Supplementary Movie 8**

Description: Time-lapse images of HeLa cells co-expressing mKate-tagged EqtSM (left, *green*) and GFP-tagged LAMP1-bSMase<sup>dead</sup> (middle, *magenta*) treated with 1 mM LLOMe for the indicated time. Images were captured

every 30 s. Scale bar, 10  $\mu\text{m}$ .
